# Supplementary material for: Disentangling primer interactions improves SARS-CoV-2 genome sequencing by multiplex tiling PCR
Source: PubMed Central journal article supplement (PMC7500614; doi:10.1371/journal.pone.0239403), 2020-09-18

**A**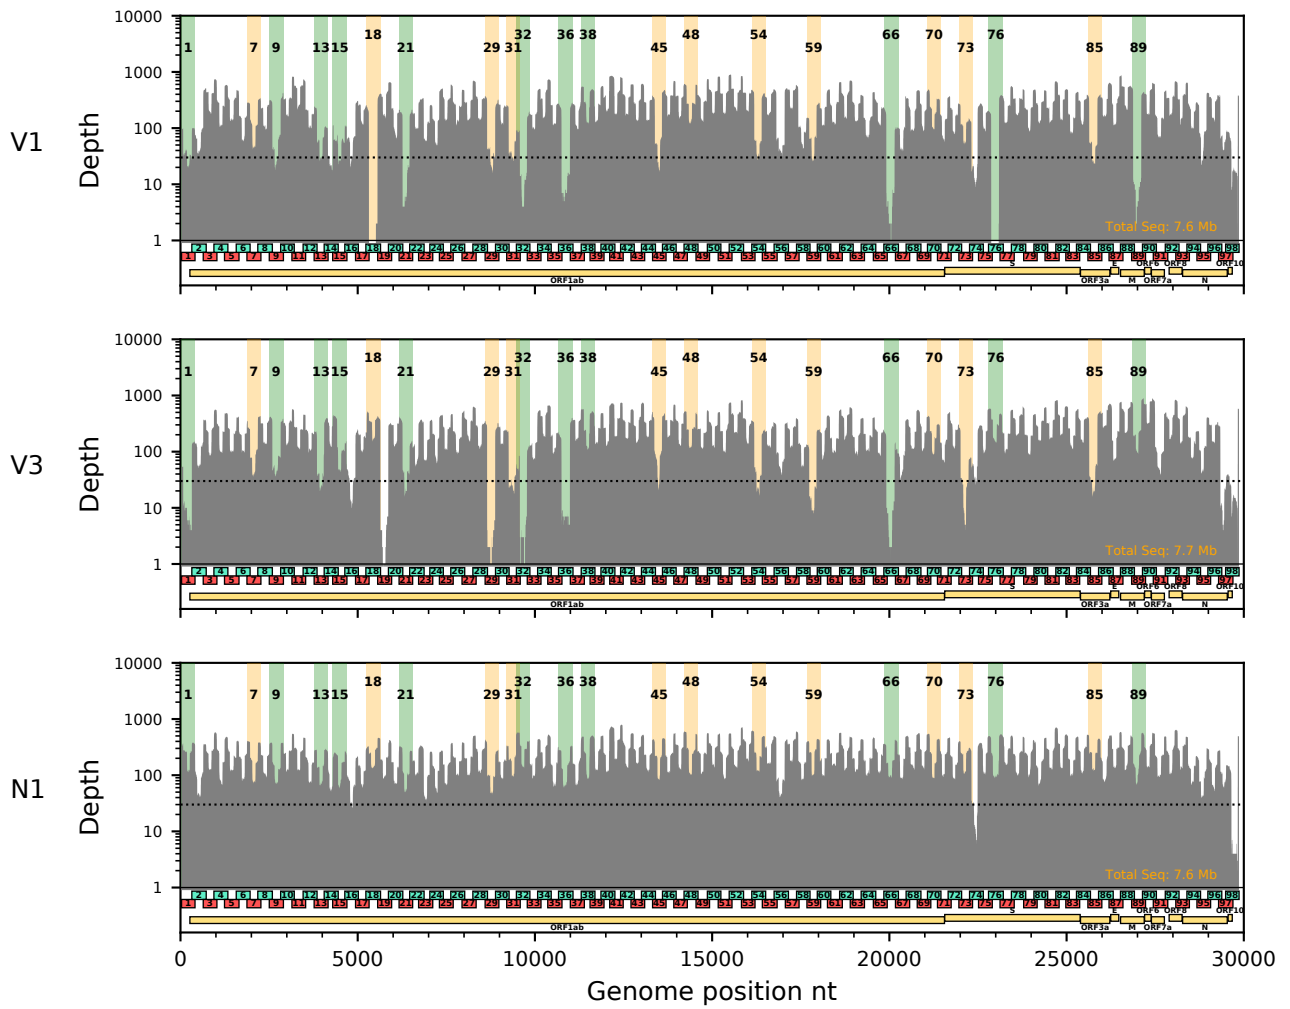**B**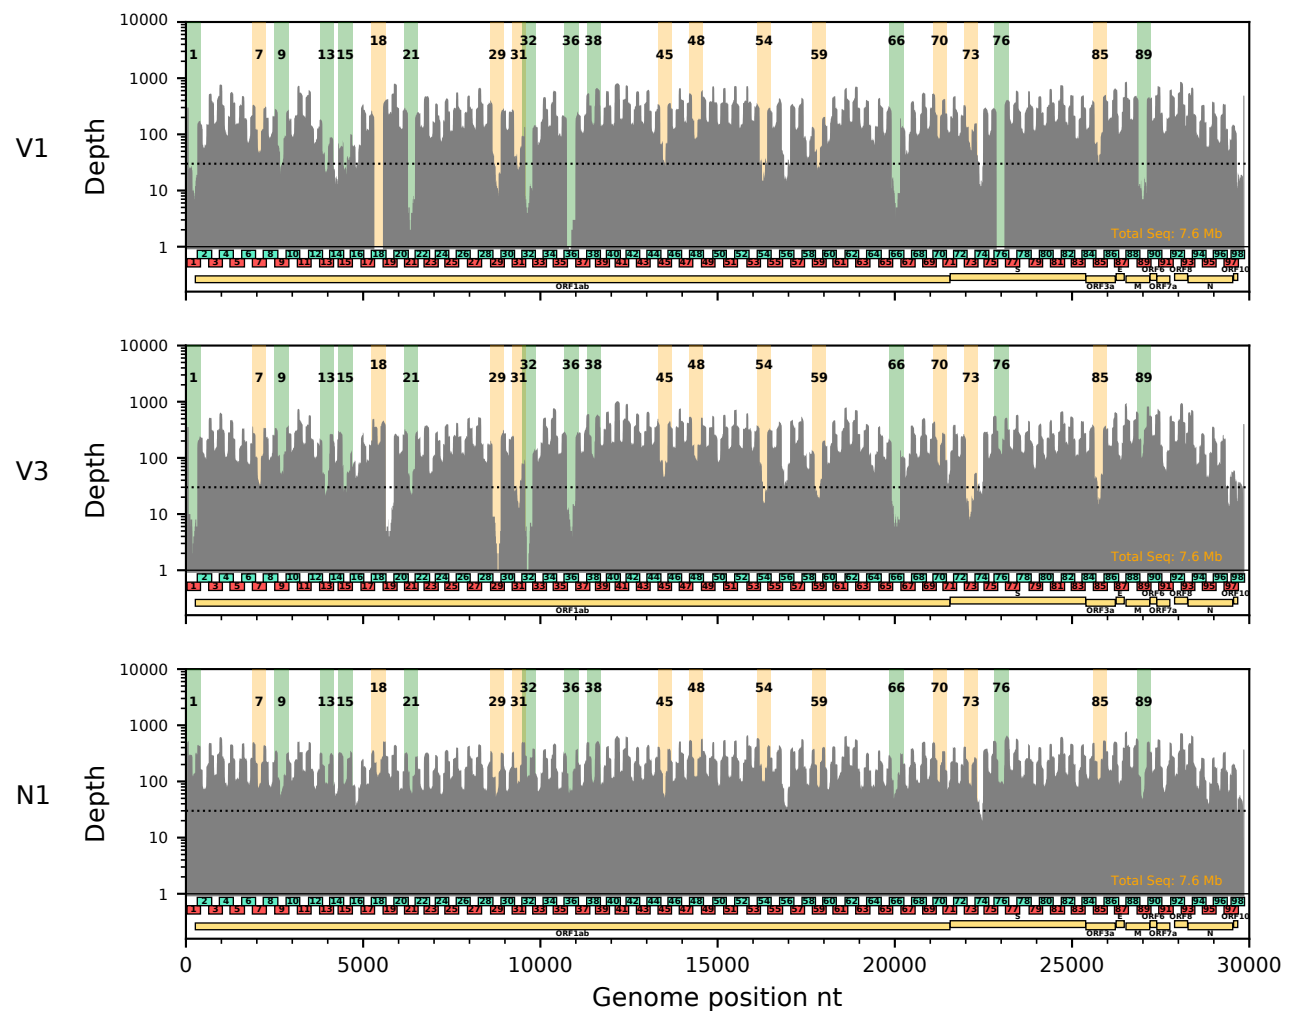

Supplement: pone.0239403.s002.pdf [file pone.0239403.s002.pdf]
